# Supplementary material for: Oxovanadium(iv) based hypocrellin B complexes with enhanced photodynamic activity
Source: Royal Society of Chemistry journal article supplement (doi:10.1039/c1dt11401h), 2011-11-08
Supplement: c1dt11401h.pdf [file c1dt11401h.pdf]

**Supporting Information for**

**Oxovanadium(IV) based Hypocrellin B Complexes with Enhanced  
Photodynamic Activity**

Yi Sun, Yue Zheng, Wan-Hua Lei, Qian-Xiong Zhou\*, Yuan-Jun Hou, Bao-Wen Zhang, and  
Xue-Song Wang\*

Key Laboratory of Photochemical Conversion and Optoelectronic Materials, Technical Institute of  
Physics and Chemistry, Chinese Academy of Sciences, Beijing 100190, P. R. China

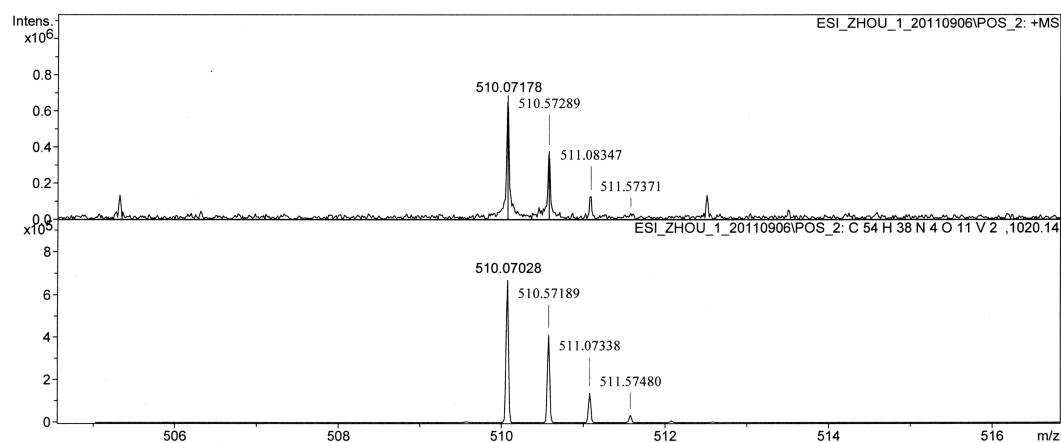

(a)

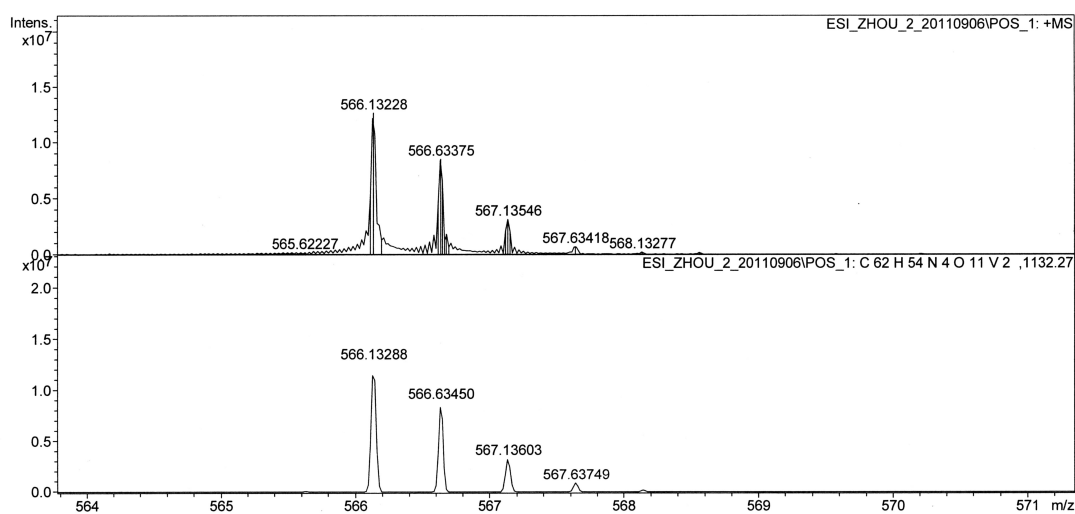

(b)

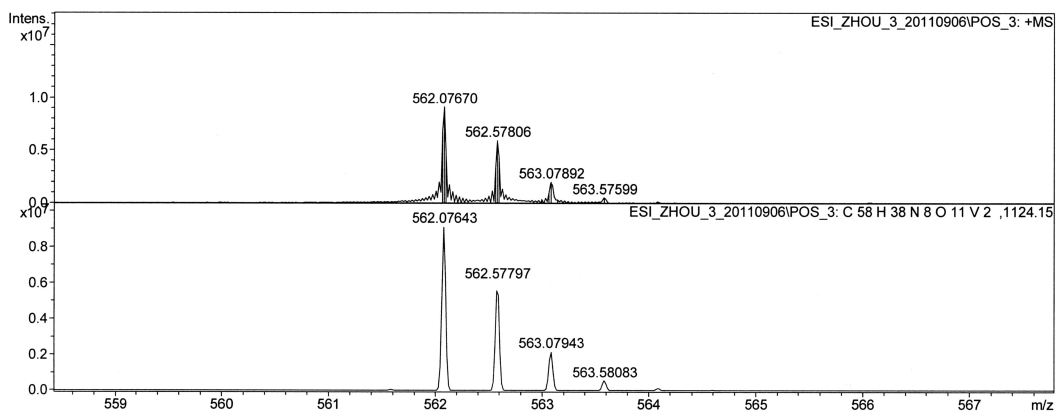

(c)

**Figure S1.** The high-resolution mass spectra of complex **1** (a), **2** (b), and **3** (c). For each spectrum, the upper panel shows the experimental results and the lower one shows the simulated spectrum obtained using the software of Bruker Daltonics Data Analysis 3.4.

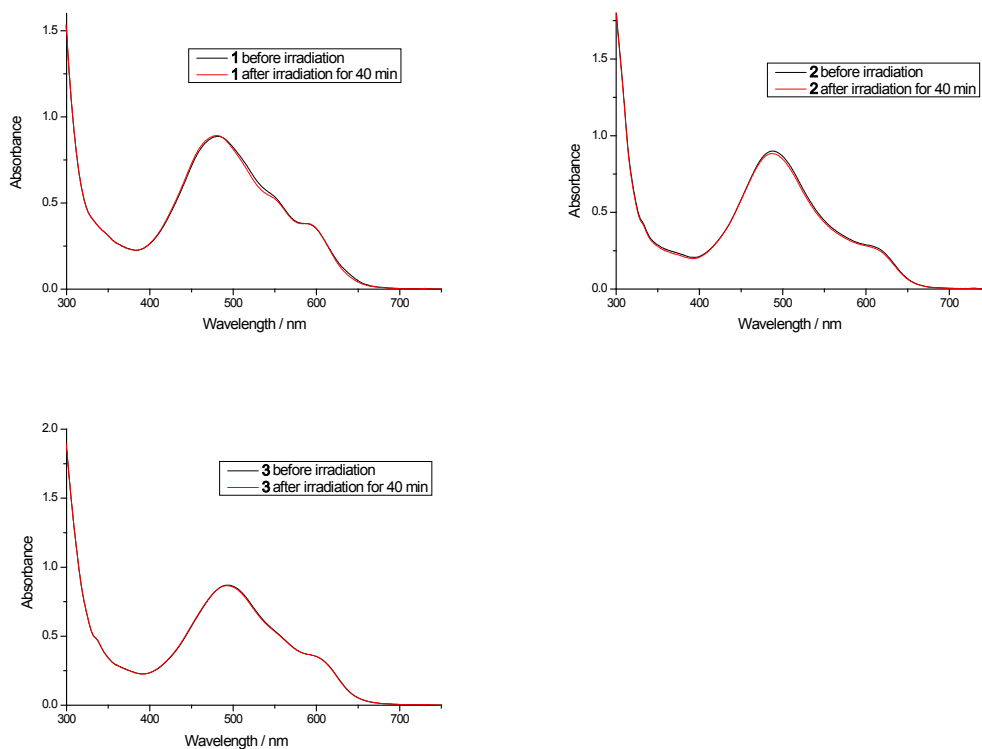

**Figure S2.** UV-vis absorption spectra of complex **1-3** solutions (25  $\mu$ M) in DMF/(Tris-CH<sub>3</sub>COOH/EDTA buffer) (pH = 7.4) before and after irradiation ( $\geq$  550 nm, 40 min).

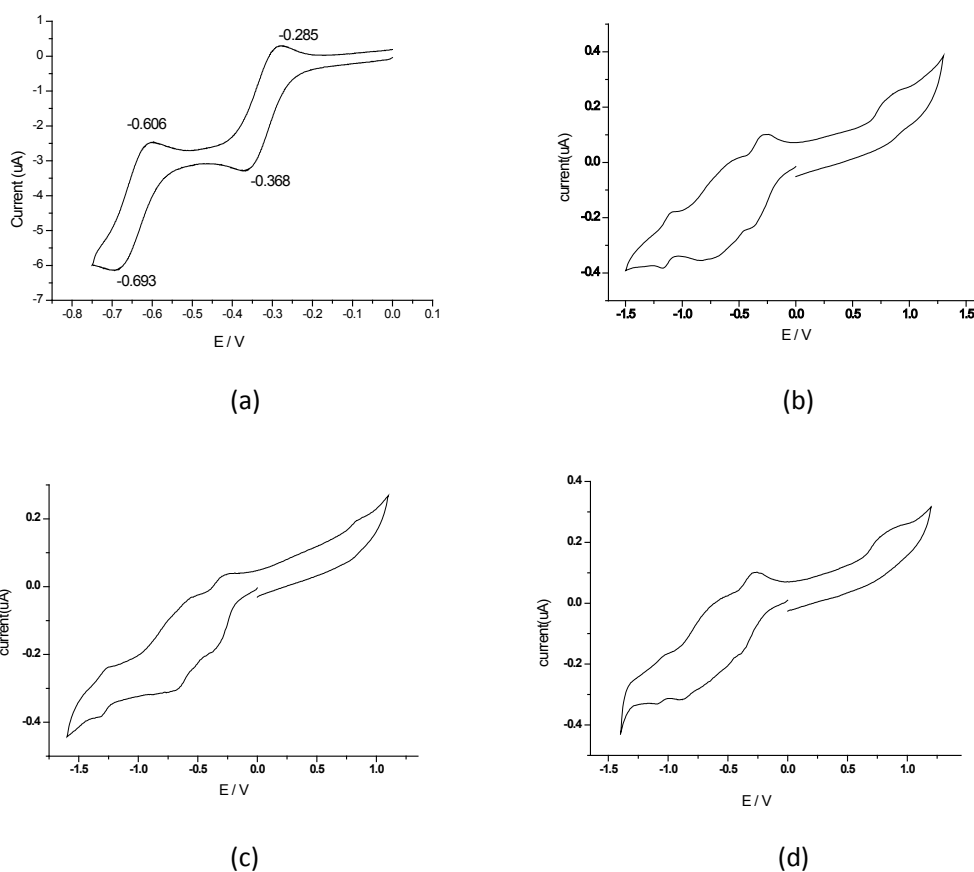

**Figure S3.** Cyclic voltammograms of HB (a) and complex 1-3 (b-d) in DMF (vs SCE). The supporting electrolyte is 0.1 M of tetra-*n*-butylammonium hexafluorophosphate, and the scan speed is 50 mV/s.

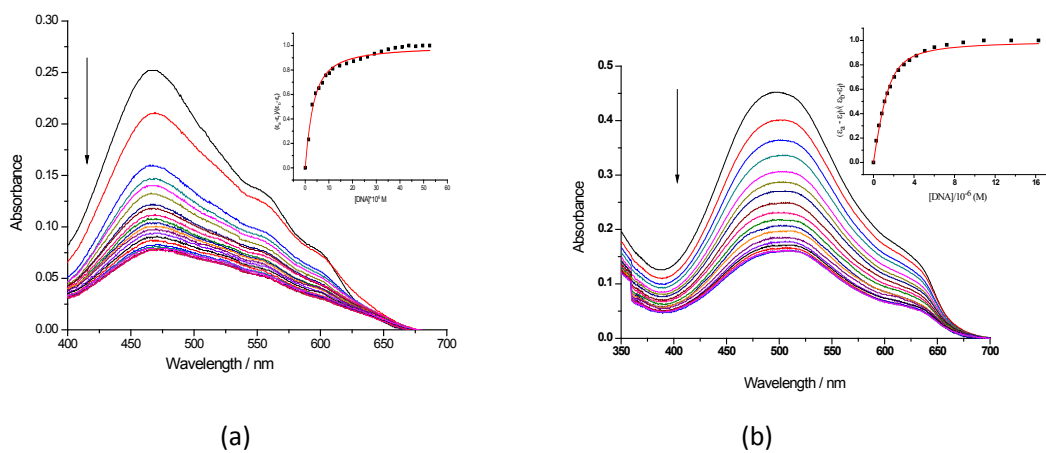

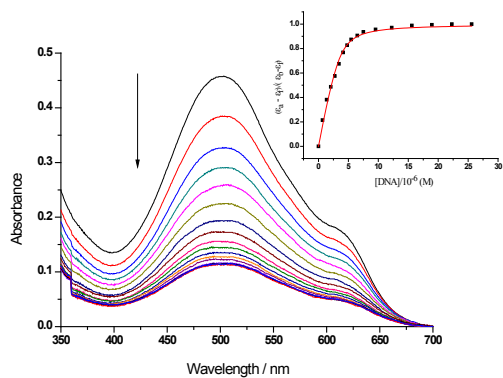

(c)

**Figure S4.** Absorption spectra of HB (a), complex **1** (b) and complex **3** (c) (13  $\mu\text{M}$ ) in PBS buffer (pH = 7.4) in the presence of varied concentrations of CT-DNA. The inset shows the plot of  $(\epsilon_a - \epsilon_f)/(\epsilon_b - \epsilon_f)$  vs. [DNA]. [HB] =  $[\text{VO}^{2+}\text{-HB}] = 2 \times 10^{-4}$  M; The maximum DNA concentration is 55.48  $\mu\text{M}$  for (a), 25.60  $\mu\text{M}$  for (b), 20.95  $\mu\text{M}$  for (c).

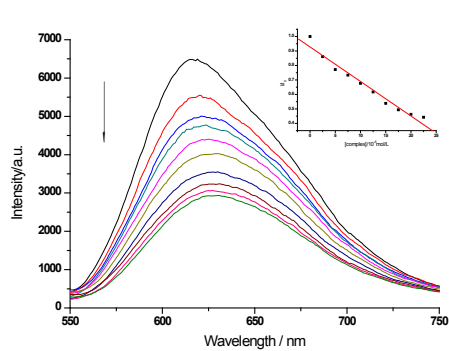

(a)

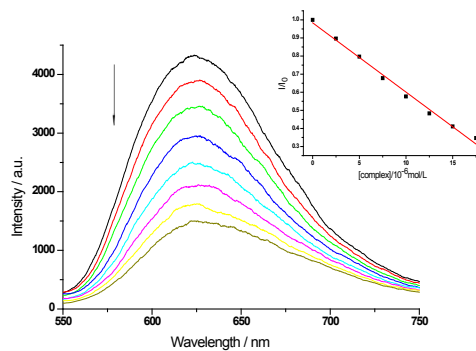

(b)

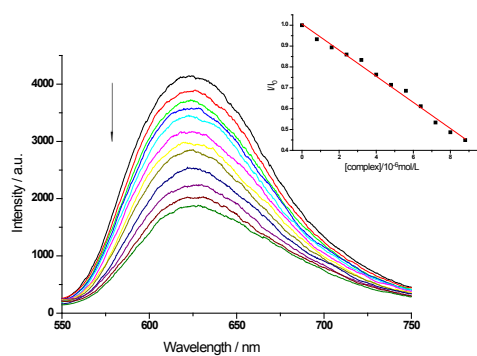

(c)

**Figure S5.** Fluorescence quenching of EB bound to CT-DNA by HB (a), complex **1** (b), and complex **3** (c). Inset is the plot of  $I/I_0$  vs. [complex].  $\lambda_{ex} = 510$  nm. The maximum concentration is 22.5  $\mu\text{M}$  for HB, 17.5  $\mu\text{M}$  for **1**, and 8.8  $\mu\text{M}$  for **3**.
